# Supplementary material
Source: PubMed Central journal article supplement (PMC8819982)
Supplement: ASN.2021091191SupplementaryData.pdf [file ASN.2021091191SupplementaryData.pdf]

**The Trifecta study: comparing plasma donor-derived cell-free DNA levels  
with the molecular phenotype of kidney transplant biopsies**

Philip F. Halloran<sup>1,2,3</sup>, Jeff Reeve<sup>1</sup>, Katelynn S. Madill-Thomsen<sup>1,3</sup>, Zachary Demko<sup>4</sup>, Adam Prewett<sup>4</sup>, Paul Billings<sup>4</sup>, and the Trifecta Investigators

<sup>1</sup>Alberta Transplant Applied Genomics Center, Edmonton, AB, Canada; <sup>2</sup>University of Alberta, Edmonton, AB, Canada; <sup>3</sup>Transcriptome Sciences Inc., Edmonton, AB, Canada; <sup>4</sup>Natera, San Carlos, CA, USA

## Table of Contents

**Supplementary Table 1.** Top unique genes positively correlated with %dd-cfDNA in the Trifecta Study (N=300) ordered by correlation coefficient ..... 3

**Supplementary Figure 1.** Relationships between %dd-cfDNA, molecular archetype groups, and GNLY expression in N=300 samples. Dots represent biopsies and corresponding paired blood sample %dd-cfDNA results, colored by archetype cluster assignments. Regression lines (dashed) show the relationship between GNLY expression and %dd-cfDNA. ....4

**Supplementary Table 1.** Top unique genes positively correlated with %dd-cfDNA in the Trifecta Study (N=300) ordered by correlation coefficient

| Affy ID       | Gene Symbol         | Gene Name                                                | Transcript Set Annotation | Spearman correlation |
|---------------|---------------------|----------------------------------------------------------|---------------------------|----------------------|
| 11751857_a_at | GNLY <sup>a</sup>   | granulysin                                               | ABMR-RAT, Rej-RAT         | 0.56                 |
| 11746954_s_at | CCL4 <sup>a</sup>   | chemokine (C-C motif) ligand 4                           | ABMR-RAT,Rej-RAT          | 0.52                 |
| 11761790_x_at | TRDC <sup>a</sup>   | T cell receptor delta constant                           | ABMR-RAT,Rej-RAT          | 0.51                 |
| 11743168_at   | IDO1 <sup>b</sup>   | indoleamine 2,3-dioxygenase 1                            | ABMR-RAT,GRIT3,Rej-RAT    | 0.51                 |
| 11749245_a_at | CXCL11 <sup>b</sup> | chemokine (C-X-C motif) ligand 11                        | ABMR-RAT,GRIT3,Rej-RAT    | 0.50                 |
| 11753484_x_at | KLRD1 <sup>a</sup>  | killer cell lectin-like receptor subfamily D, member 1   | ABMR-RAT,Rej-RAT          | 0.50                 |
| 11729649_at   | PRF1 <sup>a</sup>   | perforin 1 (pore forming protein)                        | ABMR-RAT,Rej-RAT          | 0.50                 |
| 11727116_a_at | PLA1A <sup>b</sup>  | phospholipase A1 member A                                | ABMR-RAT,GRIT3,Rej-RAT    | 0.50                 |
| 11724900_a_at | GZMB <sup>a</sup>   | granzyme B                                               | ABMR-RAT,Rej-RAT          | 0.49                 |
| 11726287_a_at | WARS <sup>b</sup>   | tryptophanyl-tRNA synthetase                             | ABMR-RAT,GRIT3,Rej-RAT    | 0.49                 |
| 11733353_at   | CRTAM <sup>a</sup>  | cytotoxic and regulatory T-cell molecule                 | ABMR-RAT,Rej-RAT          | 0.49                 |
| 11744660_s_at | CCL4L1 <sup>a</sup> | chemokine (C-C motif) ligand 4-like 1                    | ABMR-RAT,Rej-RAT          | 0.49                 |
| 11752664_a_at | S1PR5 <sup>a</sup>  | sphingosine-1-phosphate receptor 5                       | ABMR-RAT                  | 0.49                 |
| 11725642_at   | EFHD2               | EF-hand domain family member D2                          | Recent Injury (cIRIT)     | 0.48                 |
| 11735394_s_at | XCL1 <sup>a</sup>   | chemokine (C motif) ligand 1                             | ABMR-RAT,Rej-RAT          | 0.48                 |
| 11719943_at   | CXCL9 <sup>b</sup>  | chemokine (C-X-C motif) ligand 9                         | ABMR-RAT,GRIT3,Rej-RAT    | 0.48                 |
| 11729274_a_at | GBP5 <sup>b</sup>   | guanylate binding protein 5                              | ABMR-RAT,GRIT3,Rej-RAT    | 0.47                 |
| 11725861_a_at | MYBL1 <sup>a</sup>  | v-myb avian myeloblastosis viral oncogene homolog-like 1 | ABMR-RAT                  | 0.47                 |
| 11733953_x_at | GBP4 <sup>b</sup>   | guanylate binding protein 4                              | ABMR-RAT,GRIT3,Rej-RAT    | 0.47                 |
| 11716734_at   | IRF1 <sup>b</sup>   | interferon regulatory factor 1                           | ABMR-RAT,GRIT3,Rej-RAT    | 0.47                 |

<sup>a</sup> (shaded) NK cell expressed.

<sup>b</sup> IFNG-inducible

Transcript sets are described on the home page at <https://www.ualberta.ca/medicine/institutes-centres-groups/ataqc/research/gene-lists.html>

Abbreviations: ABMR-RAT – antibody-mediated rejection-associated transcripts, Rej-RAT – all rejection-associated transcripts, GRIT3 – gamma interferon and rejection-induced transcripts.

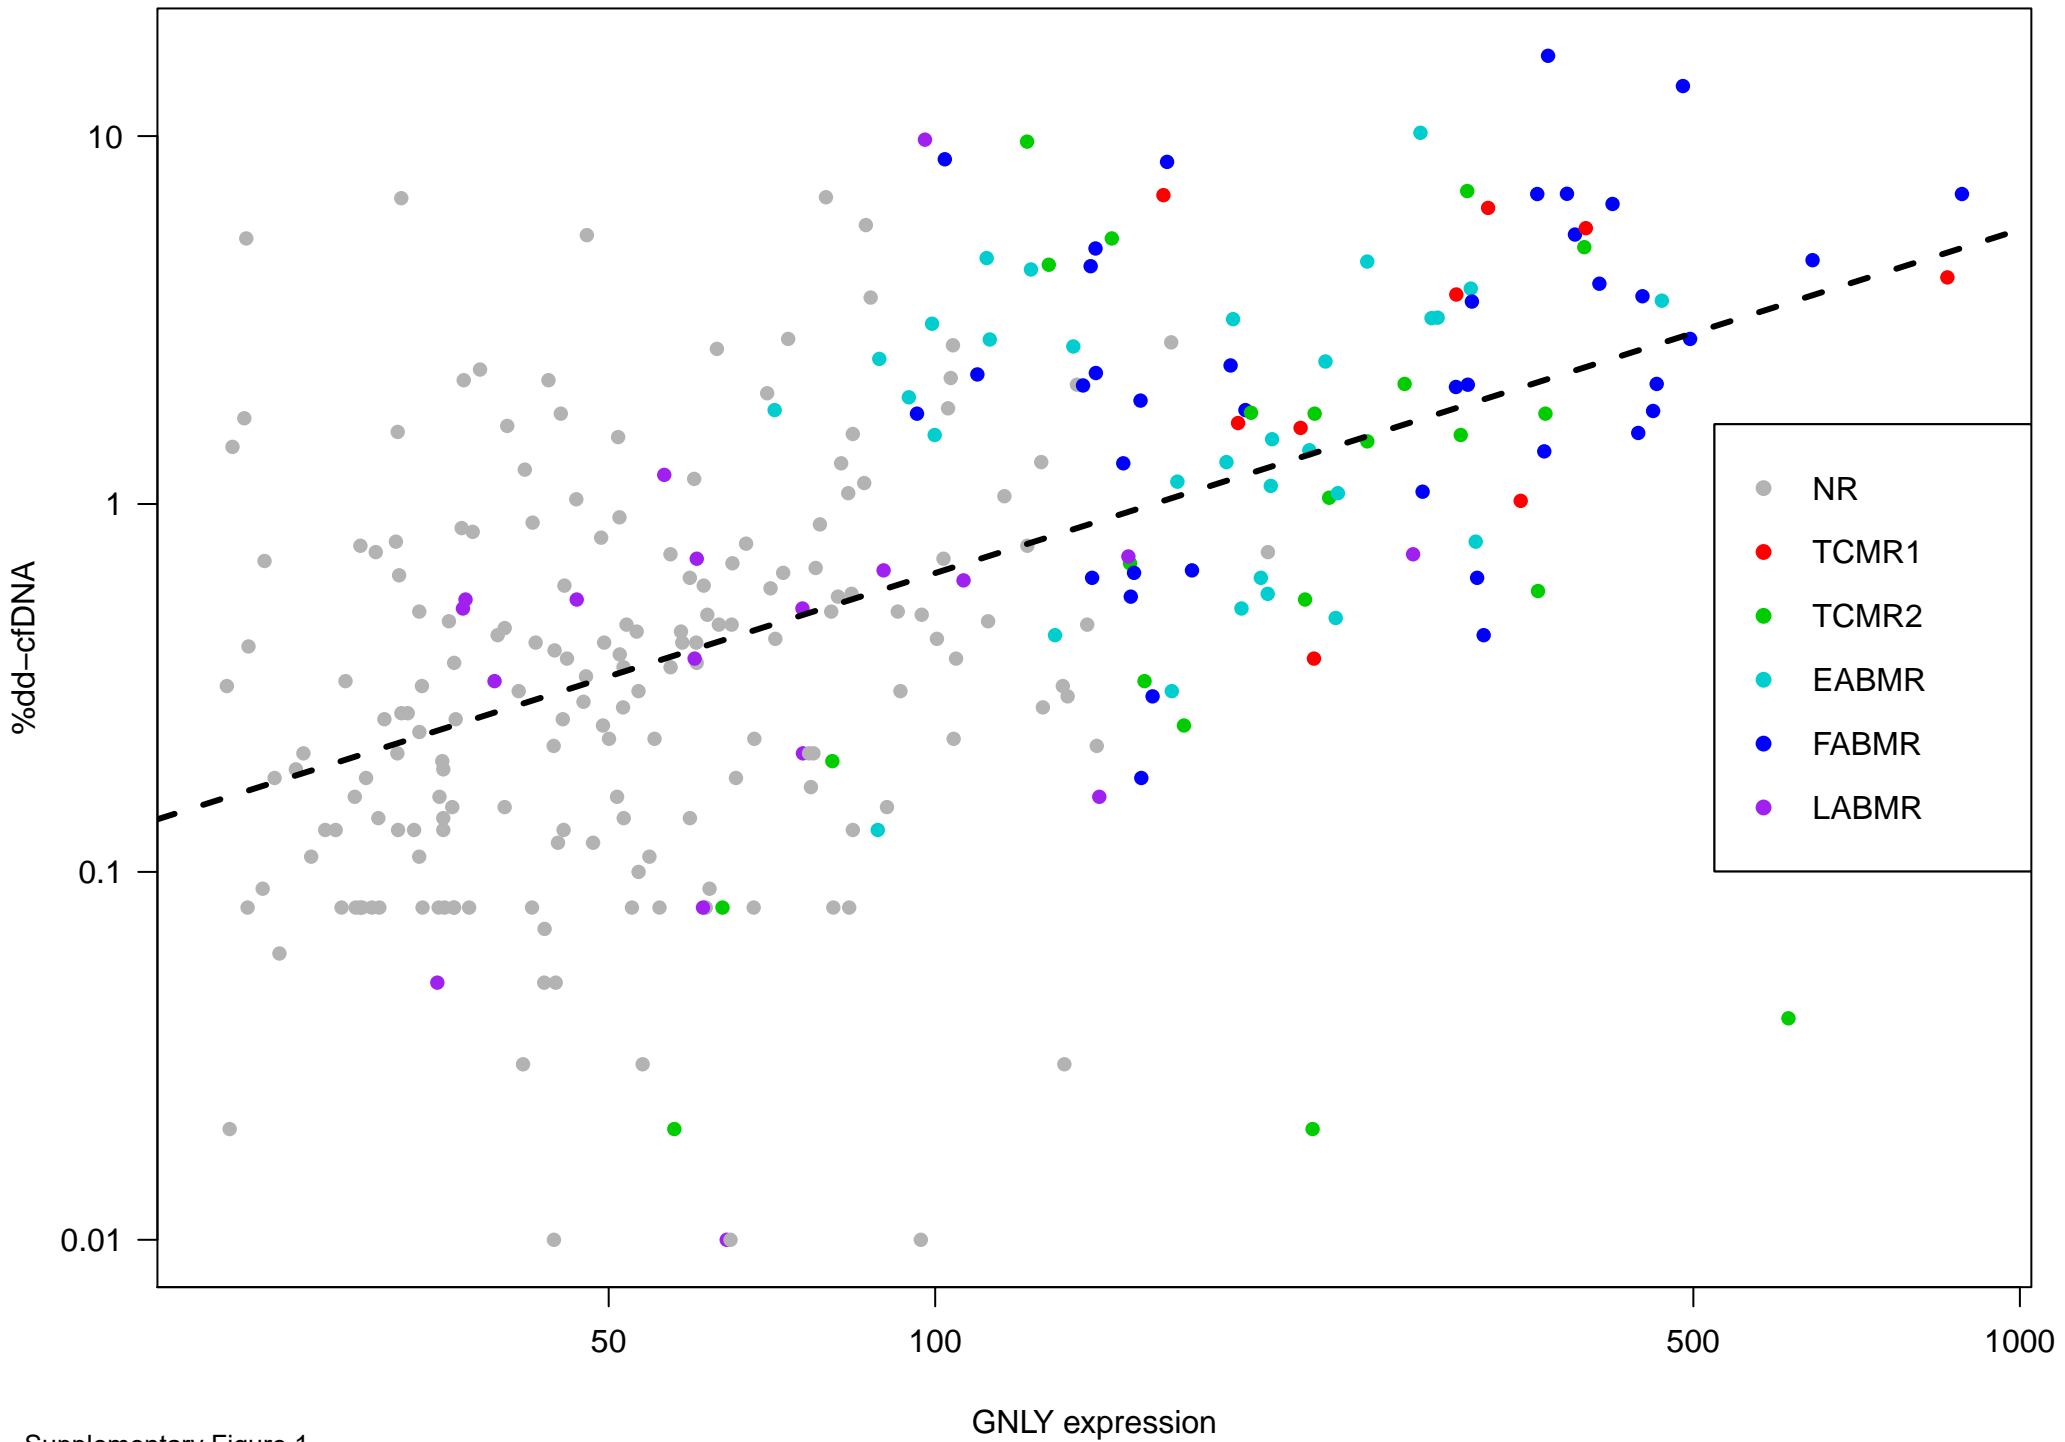

Supplementary Figure 1
